# Supplementary material
Source: PubMed Central journal article supplement (PMC8201913)
Supplement: pnas.2104592118.sapp.pdf [file pnas.2104592118.sapp.pdf]

# PNAS

[www.pnas.org](http://www.pnas.org)

Supplementary Information for

Coevolutionary phage training leads to greater bacterial suppression and delays the evolution of phage resistance

Joshua M. Borin, Sarit Avrani, Jeffrey E. Barrick, Katherine L. Petrie, and Justin R. Meyer

\*Justin R. Meyer

Email: [jrmeyer@ucsd.edu](mailto:jrmeyer@ucsd.edu)

**This PDF file includes:**

Supplementary text  
Figures S1 to S9  
Tables S1 to S2  
SI References

## Supplementary Information Text

**$\lambda$ trn Resistance.** The mechanisms by which some mutations affected  $\lambda$ trn resistance were unclear. All bacterial isolates from the coevolution experiment possessed a 12,090 bp deletion comprising 14 unannotated genes. Moreover, all populations (but not all isolates) were also found to have a 4 bp CCAG duplication in the coding sequence of another unannotated gene. And thirdly, the  $\lambda$ trn-sensitive isolate P1-T30-1 had a 777 bp IS element excision of loci *insB-22*, *insA-22* and *ECB\_02825* that have previously been found to confer  $\lambda$ trn resistance through epistasis with mutations in *malT* (2). However, no *malT* mutations were found in any of the 12 strains isolated from day 30. These results beg the question: How did these bacteria reach high densities in flasks with  $\lambda$ trn if they were sensitive? The mechanism by which the 777 bp deletion interacts with mutations in *malT* is unknown and it is possible that this deletion also interacts with mutations at other loci. Although we were unable to detect growth of day-30 isolates when cocultured with  $\lambda$ trn, it is likely that these isolates are more resistant than their ancestor REL606—but that our assay was not sensitive enough to discriminate these differences.

Lastly, we point out two instances where  $\lambda$ trn recombined into the host genome. In  $\lambda$ trn Population 2, the completely resistant isolate P2-T25-9 had 18 mutations in *ycbD*, a predicted prophage replication protein fragment gene, from positions 539,643 to 539,915. Additionally, the completely resistant isolate P3-T15-2 from Population 3 had 4 mutations in *ycbT*, a phage lysis gene, from positions 549,746 to 549,772. BLASTX of mutant sequences to REL606 and  $\lambda$  reference genomes revealed a 100% match with  $\lambda$ , whereas they showed 89% and 96.88% identity with REL606, respectively, confirming that these sequences originated from the phage. Although both recombinations from phage were found in bacteria that evolved complete resistance, we have no evidence that these recombinations carry any selective benefit. More likely, recombination occurred due to the endogenous lambda red system which recombines homologous sequences at a high rate.

**Phage Adaptation and Suppression of Resistance.** For  $\lambda$ trn Population 1, comparisons were drawn from cultures where phage inoculums were not significantly different ( $p=0.09$ , two-sample t-test) and the mean density of  $\lambda$ trn ( $\bar{x}=1.17\times 10^8$  pfu/mL) was higher than  $\lambda$ trn-P1-T25 ( $\bar{x}=6.25\times 10^7$  pfu/mL). For Population 2,  $\lambda$ trn-P2-T15 led to greater suppression ( $p=0.02$ , two sample t-test, Fig. 5D, 5E) when phage inoculums were not significantly different ( $p=0.22$ , two-sample t-test) and the mean density of  $\lambda$ trn-P2-T15 ( $\bar{x}=8.13\times 10^7$  pfu/mL) was higher than  $\lambda$ trn ( $\bar{x}=5.39\times 10^7$  pfu/mL). We note that when mean density of  $\lambda$ trn was higher than  $\lambda$ trn-P2-T15 (albeit not significantly,  $p=0.24$ ) we found no difference in suppression. Lastly, for Population 3,  $\lambda$ trn+ phage led to greater suppression ( $p=0.034$ , two sample t-test, Fig. 5G, 5H) when the mean density of  $\lambda$ trn ( $\bar{x}=3.19\times 10^8$  pfu/mL) was higher than for  $\lambda$ trn-P3-T5 ( $\bar{x}=9.69\times 10^7$  pfu/mL). Notably, when significantly more  $\lambda$ trn was used ( $\bar{x}=6.38\times 10^8$  pfu/mL compared to  $\bar{x}=3.88\times 10^8$  pfu/mL,  $p=0.02$ , two-sample t-test),  $\lambda$ trn-P3-T5 still showed significantly more suppression of host P3-T5-1-P ( $p=0.02$ , two-sample t-test).

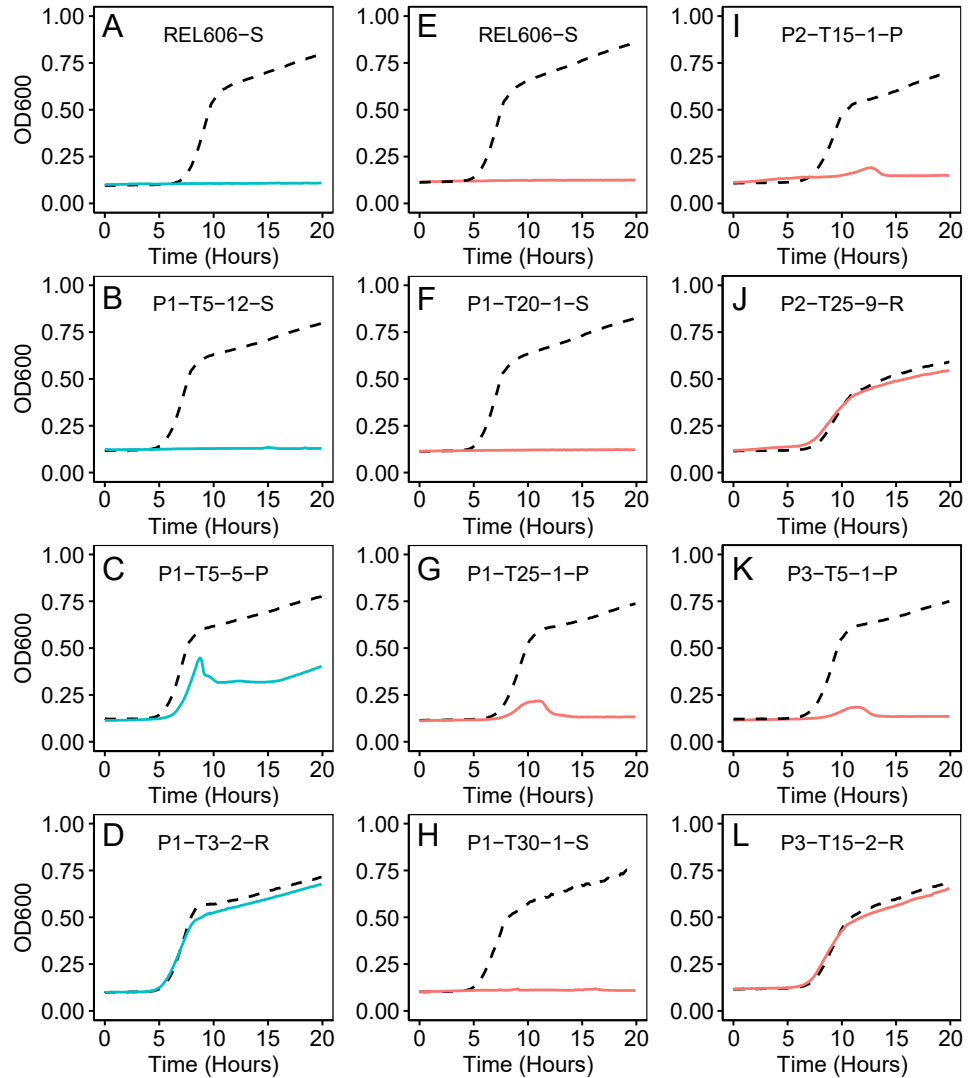

**Figure S1.** Diversity of resistance profiles determined from OD growth trajectories of bacterial isolates growing without (black, dotted) and with phage (solid, teal for  $\lambda_{unt}$ , red for  $\lambda_{trn}$ ) for 20 h. Plot titles indicate the bacterial isolate and resistance status. Apart from the ancestor REL606, isolates are labeled as [Population]-[Day Isolated]-[Isolate #]-[Resistance Status], where S = Sensitive, P = Partial Resistance, and R = Complete Resistance. Isolates were deemed sensitive if no growth was observed in the presence of phage, partially resistant if there was growth and inhibition, and completely resistant if there appeared to be no inhibition of growth by phage. Panels A-D correspond with phage  $\lambda_{unt}$  and panels E-L with  $\lambda_{trn}$ .

|               |                        | Resistant Bacterial Host |            |
|---------------|------------------------|--------------------------|------------|
|               |                        | P2-T25-9-R               | P3-T15-2-R |
| Phage Isolate | $\lambda$ trn          |                          |            |
|               | $\lambda$ trn-P2-T27-1 |                          |            |
|               | $\lambda$ trn-P2-T27-2 |                          |            |
|               | $\lambda$ trn-P2-T27-3 |                          |            |
|               | $\lambda$ trn-P2-T27-4 |                          |            |
|               | $\lambda$ trn-P2-T27-5 |                          |            |
|               | $\lambda$ trn-P2-T27-6 |                          |            |
|               | $\lambda$ trn-P3-T20-1 |                          |            |
|               | $\lambda$ trn-P3-T20-2 |                          |            |
|               | $\lambda$ trn-P3-T20-3 |                          |            |
|               | $\lambda$ trn-P3-T20-4 |                          |            |
|               | $\lambda$ trn-P3-T20-5 |                          |            |
|               | $\lambda$ trn-P3-T20-6 |                          |            |

**Figure S2.** Infectivity of  $\lambda$ trn and descendant phages on bacterial hosts isolated from the coevolution experiment. Hosts (columns, labeled as in Fig. S1) were completely resistant to  $\lambda$ trn due to *malT* and *OmpF* mutations (see Fig. S3). Lysates of  $\lambda$ trn and descendant phage isolates were spotted onto host infused LB agar. Fill indicates resistance/infectivity (grey = resistant, red = sensitive).

| Genome position | P1-T3-2-R | P2-T3-1-R | P3-T3-1-R | P1-T5-5-P | P1-T25-1-P | P1-T30-1-S | P2-T15-1-P | P2-T20-1-P | P2-T25-10-P | P2-T25-9-R | P3-T5-1-P | P3-T15-2-R | JB42-P | JB43-P | JB47-R | Mutation              | Annotation      | Gene                       |
|-----------------|-----------|-----------|-----------|-----------|------------|------------|------------|------------|-------------|------------|-----------|------------|--------|--------|--------|-----------------------|-----------------|----------------------------|
| 12,965          |           |           |           |           |            |            |            |            |             |            |           |            |        |        |        | 15 bp duplication*    | coding          | <i>dnaK</i>                |
| 37,281          |           |           |           |           |            |            |            |            |             |            |           |            |        |        |        | C→A                   | A798A (GCC→GCΔ) | <i>carB</i>                |
| 112,876         |           |           |           |           |            |            |            |            |             |            |           |            |        |        |        | (T) <sub>5→6</sub>    | coding          | <i>secA</i>                |
| 242,025         |           |           |           |           |            |            |            |            |             |            |           |            |        |        |        | Δ21,535 bp            | between IS1     | <i>ECB_00212-phoE</i>      |
| 248,651         |           |           |           |           |            |            |            |            |             |            |           |            |        |        |        | C→A                   | H180N           | <i>lpcA</i>                |
| 539,643         |           |           |           |           |            |            |            |            |             |            |           |            |        |        |        | G→T                   | pseudogene      | <i>ybcD</i>                |
| 539,649         |           |           |           |           |            |            |            |            |             |            |           |            |        |        |        | C→T                   | pseudogene      | <i>ybcD</i>                |
| 539,661         |           |           |           |           |            |            |            |            |             |            |           |            |        |        |        | G→C                   | pseudogene      | <i>ybcD</i>                |
| 539,664         |           |           |           |           |            |            |            |            |             |            |           |            |        |        |        | C→T                   | pseudogene      | <i>ybcD</i>                |
| 539,670         |           |           |           |           |            |            |            |            |             |            |           |            |        |        |        | T→C                   | pseudogene      | <i>ybcD</i>                |
| 539,673         |           |           |           |           |            |            |            |            |             |            |           |            |        |        |        | C→A                   | pseudogene      | <i>ybcD</i>                |
| 539,679         |           |           |           |           |            |            |            |            |             |            |           |            |        |        |        | A→G                   | pseudogene      | <i>ybcD</i>                |
| 539,681         |           |           |           |           |            |            |            |            |             |            |           |            |        |        |        | +T                    | pseudogene      | <i>ybcD</i>                |
| 539,686         |           |           |           |           |            |            |            |            |             |            |           |            |        |        |        | 2 bp→A                | pseudogene      | <i>ybcD</i>                |
| 539,694         |           |           |           |           |            |            |            |            |             |            |           |            |        |        |        | C→T                   | pseudogene      | <i>ybcD</i>                |
| 539,698         |           |           |           |           |            |            |            |            |             |            |           |            |        |        |        | C→A                   | pseudogene      | <i>ybcD</i>                |
| 539,721         |           |           |           |           |            |            |            |            |             |            |           |            |        |        |        | A→C                   | pseudogene      | <i>ybcD</i>                |
| 539,827         |           |           |           |           |            |            |            |            |             |            |           |            |        |        |        | T→G                   | pseudogene      | <i>ybcD</i>                |
| 539,879         |           |           |           |           |            |            |            |            |             |            |           |            |        |        |        | G→T                   | intergenic      | <i>ybcD / renD</i>         |
| 539,891         |           |           |           |           |            |            |            |            |             |            |           |            |        |        |        | A→G                   | intergenic      | <i>ybcD / renD</i>         |
| 539,893         |           |           |           |           |            |            |            |            |             |            |           |            |        |        |        | A→C                   | intergenic      | <i>ybcD / renD</i>         |
| 539,907         |           |           |           |           |            |            |            |            |             |            |           |            |        |        |        | G→C                   | intergenic      | <i>ybcD / renD</i>         |
| 539,915         |           |           |           |           |            |            |            |            |             |            |           |            |        |        |        | T→C                   | intergenic      | <i>ybcD / renD</i>         |
| 549,746         |           |           |           |           |            |            |            |            |             |            |           |            |        |        |        | C→T                   | R57R (CGC→CGT)  | <i>ybcT</i>                |
| 549,764         |           |           |           |           |            |            |            |            |             |            |           |            |        |        |        | A→G                   | A63A (GCA→GCG)  | <i>ybcT</i>                |
| 549,767         |           |           |           |           |            |            |            |            |             |            |           |            |        |        |        | G→C                   | L64L (CTG→CTC)  | <i>ybcT</i>                |
| 549,772         |           |           |           |           |            |            |            |            |             |            |           |            |        |        |        | A→C                   | E66A (GAA→GCA)  | <i>ybcT</i>                |
| 787,879         |           |           |           |           |            |            |            |            |             |            |           |            |        |        |        | Δ12,090 bp            |                 | <i>ECB_00726-ECB_00739</i> |
| 1,003,024       |           |           |           |           |            |            |            |            |             |            |           |            |        |        |        | C→A                   | D351Y (GAC→IAC) | <i>ompF</i>                |
| 1,003,277       |           |           |           |           |            |            |            |            |             |            |           |            |        |        |        | A→C                   | F266L (TTT→TTG) | <i>ompF</i>                |
| 1,117,882       |           |           |           |           |            |            |            |            |             |            |           |            |        |        |        | G→A                   | intergenic      | <i>csgD / csgB</i>         |
| 1,230,063       |           |           |           |           |            |            |            |            |             |            |           |            |        |        |        | (T) <sub>8→9</sub>    | pseudogene      | <i>hlyE</i>                |
| 1,893,290       |           |           |           |           |            |            |            |            |             |            |           |            |        |        |        | A→C                   | L35* (TIA→TGA)  | <i>prc</i>                 |
| 2,103,918       |           |           |           |           |            |            |            |            |             |            |           |            |        |        |        | (CCAG) <sub>7→8</sub> | coding          | <i>ECB_01992</i>           |
| 2,183,354       |           |           |           |           |            |            |            |            |             |            |           |            |        |        |        | A→G                   | E91E (GAA→GAG)  | <i>cdd</i>                 |
| 3,023,945       |           |           |           |           |            |            |            |            |             |            |           |            |        |        |        | Δ777 bp               |                 | <i>insB-22-ECB_02825</i>   |
| 3,481,793       |           |           |           |           |            |            |            |            |             |            |           |            |        |        |        | A→T                   | I37F (ΔTC→ITC)  | <i>malT</i>                |
| 3,482,495       |           |           |           |           |            |            |            |            |             |            |           |            |        |        |        | Δ20 bp                | coding          | <i>malT</i>                |
| 3,482,706       |           |           |           |           |            |            |            |            |             |            |           |            |        |        |        | 25 bp duplication†    | coding          | <i>malT</i>                |
| 3,734,067       |           |           |           |           |            |            |            |            |             |            |           |            |        |        |        | Δ1 bp                 | coding          | <i>gumD</i>                |
| 3,736,304       |           |           |           |           |            |            |            |            |             |            |           |            |        |        |        | Δ4,894 bp             | IS1-mediated    | <i>waaC-waaT</i>           |
| 4,141,100       |           |           |           |           |            |            |            |            |             |            |           |            |        |        |        | G→T                   | R58L (CGT→CTT)  | <i>yjC</i>                 |

**Figure S3.** Mutations of representative bacterial isolates. Teal and red labels correspond to isolates from  $\lambda$ unt and  $\lambda$ trn coevolution treatments, respectively. Orange corresponds with isolates from fluctuation tests. Coevolution isolates are labeled as in Fig. S1. S, P, and R within the labels indicate resistance level (Sensitive, Partial Resistance, and Complete Resistance) relative to the phage ancestor with which they evolved. Mutations were classified as putatively resistant if they occurred in genes 1) known to be involved in  $\lambda$  infection or 2) evolved in multiple populations, fluctuation tests, or previous coevolution experiments (yellow rows).

\* (AAGCGGCAGAAAAAG) † (AGTGGAACTGGCGGCGAGCTGCC).

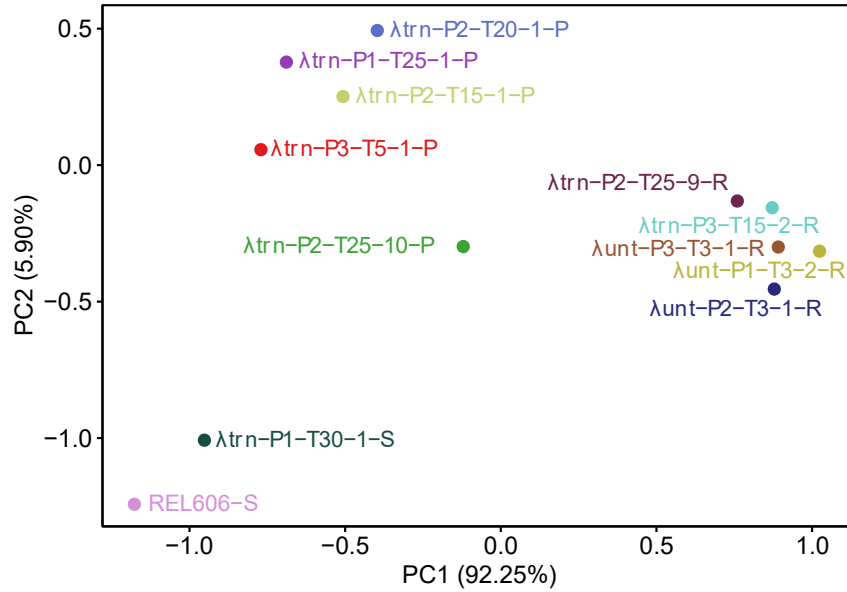

**Figure S4.** Principal Component Analysis (PCA) of the differences in OD trajectories of representative bacterial isolates growing without and with phages in plate reader experiments. PC1 distinguishes between sensitive, partial, and complete resistance against ancestral phages from respective coevolution treatments ( $\lambda_{unt}$  or  $\lambda_{trn}$ ). See Fig. S7 to assess the correlation between PC1 and a commonly calculated measure of resistance, Efficiency of Plating (EOP). Apart from the ancestor REL606, isolates are labeled adjacent to points as in Fig. S1 with their names additionally preceded with the phage treatment.

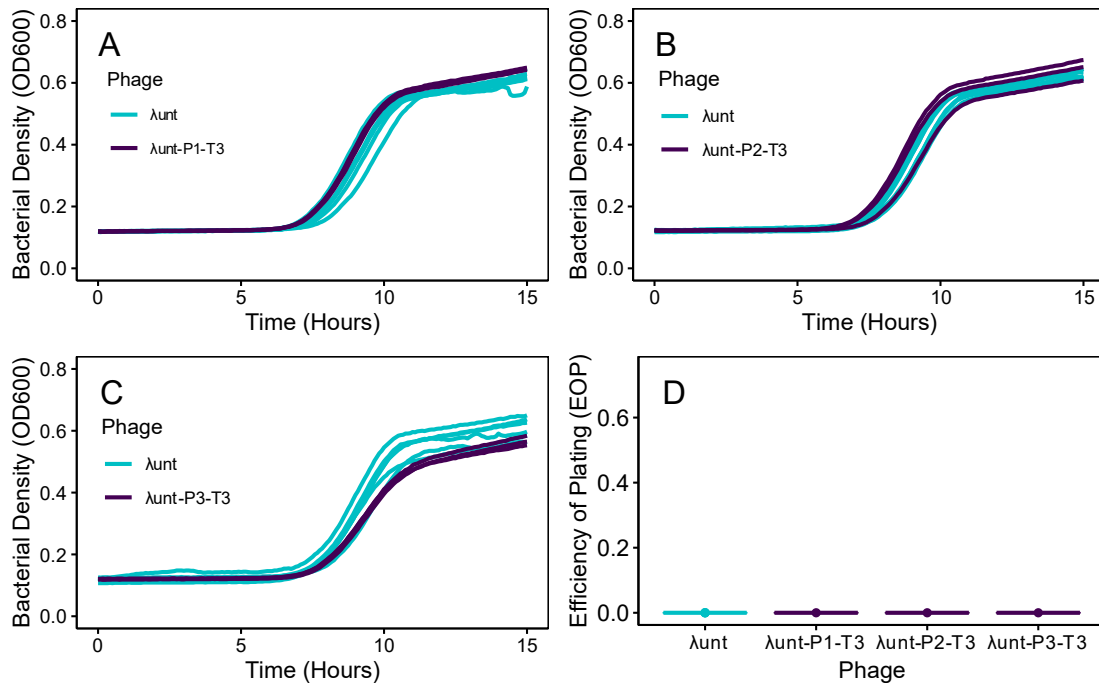

**Figure S5.** Coevolved  $\lambda_{unt+}$  phages do not show improved suppression of resistant bacteria isolated on the very first day resistance was detected. Panels A-C: Growth trajectories of replicate wells were inoculated with ~1000 cells of the resistant host and either  $\lambda_{unt}$  (teal, n=6) or a contemporary  $\lambda_{unt+}$  phage (purple, n=3) from the same population and time-point as the host. Panel A pertains to host P1-T3-2-R. Panel B pertains to host P2-T3-1-R. Panel C pertains to host P3-T3-1-R. Panel D: Efficiency of plating (EOP) of  $\lambda_{unt}$  and  $\lambda_{unt+}$  phages on respective, resistant hosts compared to on REL606. One explanation for why  $\lambda_{unt+}$  strains do not possess enhanced ability to suppress resistant bacteria is that they may not have had an opportunity to evolve yet. We can reject this explanation because each isolate gained multiple mutations in the reactive region of host recognition gene *J*. These mutations were identified in previous coevolution experiments and were shown to be adaptive;  $\lambda_{unt-P1-T3}$ : C2999T, G3319A.  $\lambda_{unt-P2-T3}$  and  $\lambda_{unt-P3-T3}$ : C2999T, C3147A, T3380C (1,2). The conclusion is that despite gaining adaptive mutations,  $\lambda_{unt+}$  strains were still unable to significantly suppress resistant bacteria.

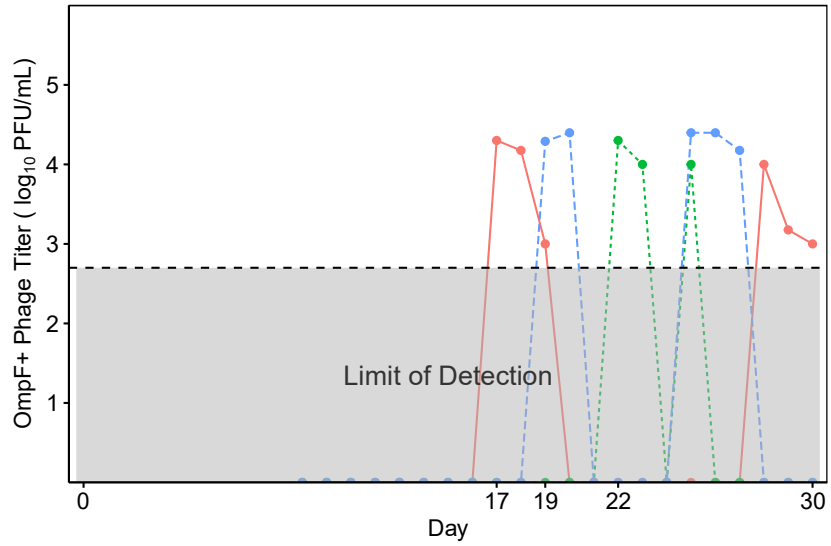

**Figure S6.** Emergence and density of OmpF<sup>+</sup> phages evolved *de novo* during the initial experiment (Fig. 1) in the  $\lambda_{unt}$  treatment. OmpF<sup>+</sup> phages in Population 1 (solid, red), Population 2 (dotted, green), and Population 3 (dashed, blue) were first detected on days 17, 22, and 19, respectively. OmpF<sup>+</sup> phages were detected and enumerated by spotting phage lysate on soft agar plates infused with cells of a LamB<sup>-</sup> REL606 mutant.



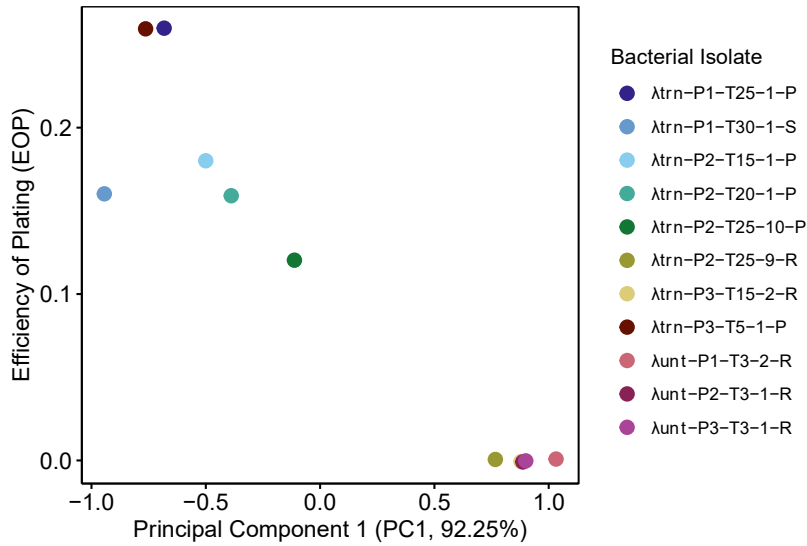

**Figure S7.** Correlation between Principal Component 1 (PC1, see Fig. S4) and Efficiency of Plating (EOP) of different representative resistant bacterial isolates (Spearman's rank correlation,  $n=11$ ,  $p=0.0003$ ,  $\rho=-0.879$ ). Higher values of PC1 and lower values of EOP correspond with greater resistance. Bacteria are labeled as in Fig. S1 with their names additionally preceded with the phage treatment.

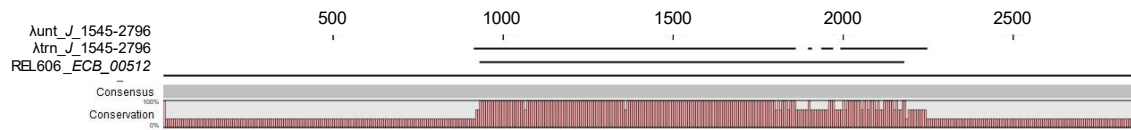

**Figure S8.** Alignment of recombination region (*J* positions 1545-2796) of  $\lambda$ unt (no recombination) and  $\lambda$ otr (with recombination) with REL606 *ECB\_00512* (genome positions 551811-554657). Sequence alignment was conducted in CLC Sequence Viewer 8.0.

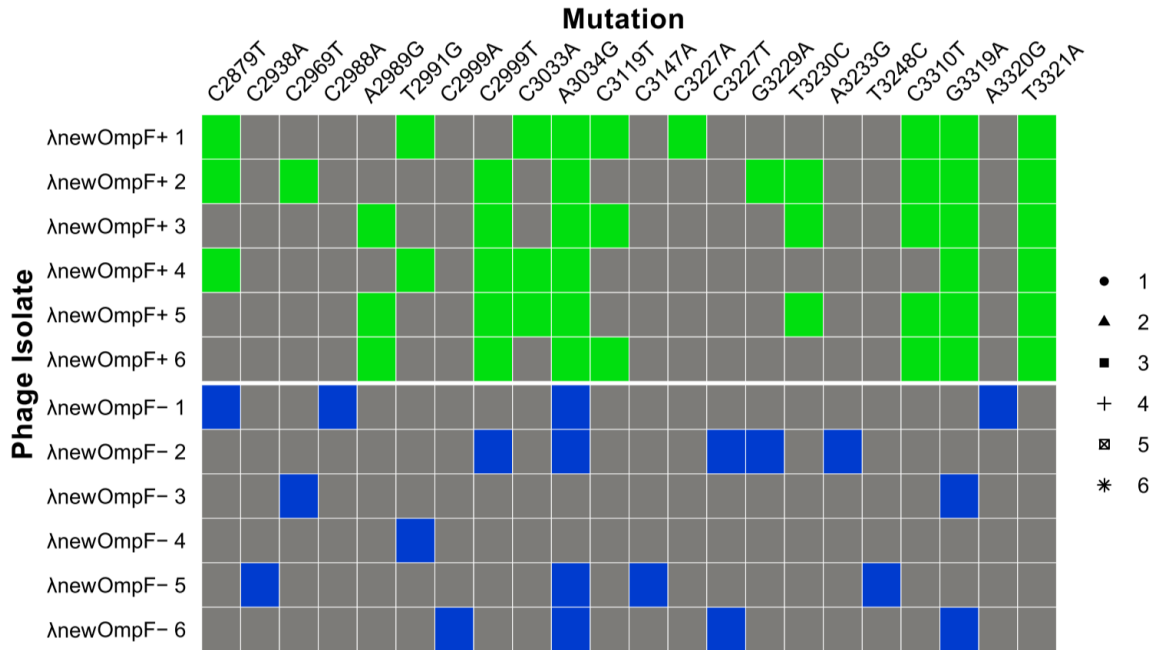

**Figure S9.** Mutations in the reactive region of host recognition gene *J* of new trained phage genotypes. λnewOmpF+ phages at top (mutations indicated by green) and λnewOmpF- phages at bottom (mutations indicated by blue). Symbols at right indicate how different genotypes correspond with lines in Fig. 7.

**Table S1.** Genomic differences between untrained phage  $\lambda$ unt ( $\lambda$ cl26) and trained phage  $\lambda$ trn. For genomic differences between  $\lambda$ unt and the  $\lambda$  reference genome (GenBank: NC\_001416) see Meyer et al. 2012 (1). Synonymous mutations are in green and nonsynonymous mutations in blue. Mutations from position 17,049 to 17,868 evolved via recombination with a relict prophage in the genome of REL606 (1).

| Genome position | Mutation      | Type          | Amino acid change | Gene     | Product                        |
|-----------------|---------------|---------------|-------------------|----------|--------------------------------|
| 11,451          | C → T         | Substitution  | A304V             | <i>H</i> | Tail component                 |
| 17,049          | C → T         | Recombination | S515S             | <i>J</i> | Tail: host specificity protein |
| 17,055          | T → C         | Recombination | G517G             | <i>J</i> | Tail: host specificity protein |
| 17,059          | G → A         | Recombination | A519T             | <i>J</i> | Tail: host specificity protein |
| 17,081          | +G            | Recombination | —                 | <i>J</i> | Tail: host specificity protein |
| 17,082          | A → C         | Recombination | G526G             | <i>J</i> | Tail: host specificity protein |
| 17,085          | $\Delta$ 1 bp | Recombination | —                 | <i>J</i> | Tail: host specificity protein |
| 17,088          | C → G         | Recombination | G528G             | <i>J</i> | Tail: host specificity protein |
| 17,090          | A → G         | Recombination | N529S             | <i>J</i> | Tail: host specificity protein |
| 17,136          | A → G         | Recombination | V544V             | <i>J</i> | Tail: host specificity protein |
| 17,160          | T → C         | Recombination | G552G             | <i>J</i> | Tail: host specificity protein |
| 17,183          | A → G         | Recombination | E560G             | <i>J</i> | Tail: host specificity protein |
| 17,200          | C → T         | Recombination | L566L             | <i>J</i> | Tail: host specificity protein |
| 17,211          | A → C         | Recombination | R569R             | <i>J</i> | Tail: host specificity protein |
| 17,280          | G → A         | Recombination | V592V             | <i>J</i> | Tail: host specificity protein |
| 17,328          | A → C         | Recombination | E608D             | <i>J</i> | Tail: host specificity protein |
| 17,334          | T → C         | Recombination | S610S             | <i>J</i> | Tail: host specificity protein |
| 17,343          | G → A         | Recombination | V613V             | <i>J</i> | Tail: host specificity protein |
| 17,391          | T → C         | Recombination | T629T             | <i>J</i> | Tail: host specificity protein |
| 17,409          | T → C         | Recombination | Y635Y             | <i>J</i> | Tail: host specificity protein |
| 17,421          | G → C         | Recombination | A639A             | <i>J</i> | Tail: host specificity protein |
| 17,424          | A → C         | Recombination | R640R             | <i>J</i> | Tail: host specificity protein |
| 17,430          | C → T         | Recombination | D642D             | <i>J</i> | Tail: host specificity protein |
| 17,433          | A → G         | Recombination | T643T             | <i>J</i> | Tail: host specificity protein |
| 17,457          | T → C         | Recombination | S651S             | <i>J</i> | Tail: host specificity protein |
| 17,466          | C → T         | Recombination | L654L             | <i>J</i> | Tail: host specificity protein |
| 17,469          | T → C         | Recombination | R655R             | <i>J</i> | Tail: host specificity protein |
| 17,478          | +GG           | Recombination | —                 | <i>J</i> | Tail: host specificity protein |
| 17,487          | C → T         | Recombination | D661D             | <i>J</i> | Tail: host specificity protein |
| 17,494          | A → C         | Recombination | S664R             | <i>J</i> | Tail: host specificity protein |
| 17,502          | G → A         | Recombination | R666R             | <i>J</i> | Tail: host specificity protein |
| 17,535          | A → T         | Recombination | T677T             | <i>J</i> | Tail: host specificity protein |
| 17,547          | G → A         | Recombination | T681T             | <i>J</i> | Tail: host specificity protein |
| 17,556          | G → T         | Recombination | A684A             | <i>J</i> | Tail: host specificity protein |
| 17,586          | G → A         | Recombination | A694A             | <i>J</i> | Tail: host specificity protein |
| 17,613          | T → G         | Recombination | D703E             | <i>J</i> | Tail: host specificity protein |
| 17,652          | A → G         | Recombination | A716A             | <i>J</i> | Tail: host specificity protein |
| 17,659          | 2bp → CA      | Recombination | —                 | <i>J</i> | Tail: host specificity protein |
| 17,673          | G → A         | Recombination | T723T             | <i>J</i> | Tail: host specificity protein |
| 17,679          | C → G         | Recombination | G725G             | <i>J</i> | Tail: host specificity protein |
| 17,721          | C → T         | Recombination | D739D             | <i>J</i> | Tail: host specificity protein |
| 17,759          | A → G         | Recombination | Q752R             | <i>J</i> | Tail: host specificity protein |
| 17,775          | A → G         | Recombination | R757R             | <i>J</i> | Tail: host specificity protein |
| 17,788          | +CA           | Recombination | —                 | <i>J</i> | Tail: host specificity protein |
| 17,795          | $\Delta$ 2 bp | Recombination | —                 | <i>J</i> | Tail: host specificity protein |
| 17,805          | T → C         | Recombination | G767G             | <i>J</i> | Tail: host specificity protein |
| 17,862          | C → T         | Recombination | Y786Y             | <i>J</i> | Tail: host specificity protein |
| 17,868          | T → C         | Recombination | Y788Y             | <i>J</i> | Tail: host specificity protein |
| 18,285          | C → A         | Recombination | D927E             | <i>J</i> | Tail: host specificity protein |

|        |                    |               |                        |                |                                |
|--------|--------------------|---------------|------------------------|----------------|--------------------------------|
| 18,297 | 4bp →<br>ATAT      | Recombination | —                      | <i>J</i>       | Tail: host specificity protein |
| 18,503 | C → T              | Substitution  | <a href="#">A1000V</a> | <i>J</i>       | Tail: host specificity protein |
| 18,538 | A → G              | Substitution  | <a href="#">S1012G</a> | <i>J</i>       | Tail: host specificity protein |
| 18,814 | C → T              | Substitution  | <a href="#">H1104Y</a> | <i>J</i>       | Tail: host specificity protein |
| 18,823 | G → A              | Substitution  | <a href="#">D1107K</a> | <i>J</i>       | Tail: host specificity protein |
| 18,825 | T → A              | Substitution  | <a href="#">D1107K</a> | <i>J</i>       | Tail: host specificity protein |
| 18,868 | A → T              | Substitution  | <a href="#">I1122F</a> | <i>J</i>       | Tail: host specificity protein |
| 19,260 | T → C              | Substitution  | <a href="#">L99P</a>   | <i>lom</i>     | Outer host membrane            |
| 20,661 | A → G              | Substitution  | <a href="#">K338E</a>  | <i>Orf-401</i> | Tail fiber protein             |
| 45,176 | (G) <sub>5→6</sub> | Insertion     | —                      | <i>Orf-64</i>  | Hypothetical prot./anti-holin  |

**Table S2.** Primers used to amplify segments of  $\lambda$  gene *J* for engineering alleles with the recombination.

| <b>Primer ID</b> | <b>Primer Position</b> | <b>Sequence (5' → 3')</b> |
|------------------|------------------------|---------------------------|
| J Forward        | 15 bp upstream         | CTGCGGGCGGTTTTGTCATT      |
| 2906 J Forward   | Intergenic (2906)      | CTCCGGGACGCTCAGTA         |
| J Reverse        | 318 bp downstream      | ACGTATCCTCCCCGGTCATCACT   |

## SI References

1. J. R. Meyer *et al.*, Repeatability and contingency in the evolution of a key innovation in phage lambda. *Science* **335**, 428-432 (2012).
2. A. Gupta *et al.*, Leapfrog dynamics in phage-bacteria coevolution revealed by joint analysis of cross-infection phenotypes and whole genome sequencing. *bioRxiv* doi: 10.1101/2020.10.31.337758
